# Supplementary material
Source: PubMed Central journal article supplement (PMC4002214)

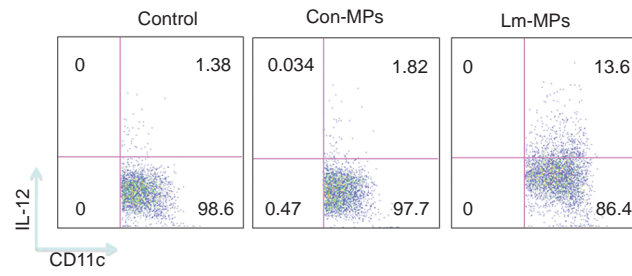

Supplemental Figure 1

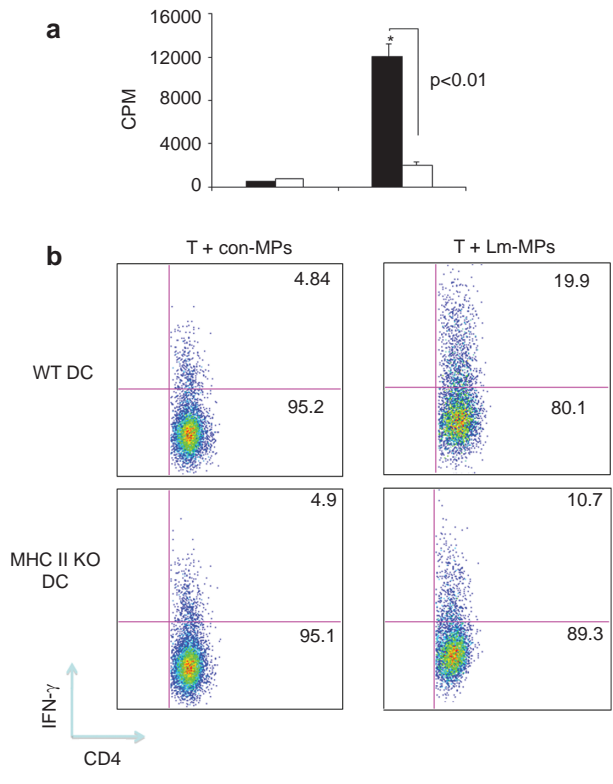

Supplemental Figure 2

Supplement: cmi201233x1.pdf [file cmi201233x1.pdf]
